# Supplementary material for: Assessment of Tennessee’s county-level vulnerability to hepatitis C virus and HIV outbreaks using socioeconomic, healthcare, and substance use indicators
Source: PubMed Central journal article supplement (PMC9352017; doi:10.1371/journal.pone.0270891), 2022-08-04
Supplement: pone.0270891.s001.pdf [file pone.0270891.s001.pdf]

**Supplementary table 1: summary of 75 potential HIV/HCV outbreak vulnerability model indicators, description, and data sources — Tennessee, 2016-2017 data**

| Potential Indicator                                                     | Indicator Description (County-level)                                                                                                                                                                                                                              | Data Source                                                |
|-------------------------------------------------------------------------|-------------------------------------------------------------------------------------------------------------------------------------------------------------------------------------------------------------------------------------------------------------------|------------------------------------------------------------|
| Acute hepatitis C infection rate                                        | Number of acute Hepatitis C infection cases per 100,000 population                                                                                                                                                                                                | TDH Viral Hepatitis Program, 2016–2017 average             |
| Adults reporting poor/fair health                                       | Percentage of adults reporting fair or poor health (age-adjusted).                                                                                                                                                                                                | County Health Rankings, 2018                               |
| Behavioral Health Safety Net Service Rate                               | Rate of individuals receiving Behavioral Health Safety Net Services, an uninsured population. Rate per 1,000 people served in each county                                                                                                                         | TDMHSAS, 2017                                              |
| Certified pain management clinics                                       | Count of certified pain clinics per county. This does not capture pain clinics that are not registered.                                                                                                                                                           | Health Licensure and Regulation, 2017                      |
| Chronic hepatitis C infection rate                                      | Number of chronic hepatitis C infection cases, ages 13-39, per 100,000 population                                                                                                                                                                                 | TDH Viral Hepatitis Program, 2016–2017 average             |
| Crowded housing units                                                   | More than 1 person per bedroom for a given residence. This measure is the average percentage of homes that were defined as being crowded.                                                                                                                         | American Community Survey, 2016–2017 average               |
| Death rate, all drugs                                                   | Number of deaths related to all drugs, per 100,000.                                                                                                                                                                                                               | TDH Prescription Drug Overdose Program, 2016–2017 average  |
| Death rate, heroin and opioids only                                     | Number of deaths related to heroin and opioids, per 100,000.                                                                                                                                                                                                      | TDH Prescription Drug Overdose Program, 2016–2017 average  |
| Deaths related to all drugs                                             | The count of all deaths attributed to any kind of drug. The county of residence for the person who died is captured.                                                                                                                                              | TDH Prescription Drug Overdose Program, 2016–2017 average  |
| Deaths related to heroin and opioids only                               | The count of all deaths attributed to heroin or opioids. The county of residence for the person who died is captured.                                                                                                                                             | TDH Prescription Drug Overdose Program, 2016–2017 average  |
| Drug coalition                                                          | Funded drug coalition present within the county (yes/no).                                                                                                                                                                                                         | TDMHSAS, fiscal year 2018                                  |
| Drug trafficking 'hot zone'                                             | County identified as a 'drug trafficking hot zone' by the department of justice (yes/no).                                                                                                                                                                         | High Intensity Drug Trafficking Area (HIDTA) Program, 2017 |
| Drug-related crimes                                                     | The number of drug crimes (distribution and selling charges, possession and concealing charges) in a county. This includes only narcotic drugs.                                                                                                                   | Tennessee Bureau of Investigation, 2016–2017 average       |
| Female headed households                                                | Average number of female headed households (divorced, widowed, never married and over 18).                                                                                                                                                                        | American Community Survey, 2016–2017 average               |
| GINI Coefficient                                                        | Summary measure of income inequality. Values range from 0 to 1, with higher scores indicating greater inequality.                                                                                                                                                 | American Community Survey, 2016–2017 average               |
| Highway access                                                          | At least 1 interstate or major US highway exit in or within 5 miles of the county border.                                                                                                                                                                         | TN Department of Corrections                               |
| HIV cases related to injection drug use                                 | The count of any living diagnosed HIV cases related to injection drug use.                                                                                                                                                                                        | TDH HIV Surveillance Program, 2016–2017 average            |
| HIV incidence rate                                                      | The number of new HIV diagnoses, per 100,000 population.                                                                                                                                                                                                          | TDH HIV Surveillance Program, 2016–2017 average            |
| HIV prevalence rate                                                     | The number of living diagnosed HIV cases, per 100,000 population.                                                                                                                                                                                                 | TDH HIV Surveillance Program, 2016–2017 average            |
| Homes with no phone service                                             | Average number of homes without phone service.                                                                                                                                                                                                                    | American Community Survey, 2016–2017 average               |
| Injury related deaths                                                   | Number of deaths related to injuries.                                                                                                                                                                                                                             | County Health Rankings, 2018                               |
| Mental health provider rate                                             | The number of mental health providers per 100,000 population.                                                                                                                                                                                                     | County Health Rankings, 2018                               |
| Mental health providers                                                 | The number of mental health providers.                                                                                                                                                                                                                            | County Health Rankings, 2018                               |
| Methadone clinics                                                       | Presence of at least one methadone clinic for a given county (yes/no).                                                                                                                                                                                            | TDMHSAS, 2017                                              |
| Missing indicator for buprenorphine providers                           | A missingness indicator was included to address the missingness of this variable.                                                                                                                                                                                 | SAMHSA                                                     |
| Morphine milligram equivalent (MME), log                                | The log of the total morphine milligram equivalent for all dispensed opioids prescribed for pain.                                                                                                                                                                 | TDH Prescription Drug Overdose Program, 2016–2017 average  |
| Multiple provider episodes                                              | Also known as “doctor shopping,” defined as a single patient filling an opioid prescription with at least 5 distinct pharmacies and from at least 5 distinct prescribers in a 6 month period (January 1–June 30 or July 1–December 31).                           | TDH Prescription Drug Overdose Program, 2016–2017 average  |
| National Center for Health Statistics (NCHS) rural-urban classification | Counties were categorized into one of six categories based on delineation of metropolitan statistical areas and micropolitan statistical areas: 1) Large central metro, 2) Large fringe metro, 3) Medium metro, 4) Small metro, 5) Micropolitan, and 6) Non-core. | NCHS, 2013                                                 |
| Neonatal abstinence syndrome cases                                      | The number of neonatal abstinence syndrome cases per county.                                                                                                                                                                                                      | Family Health and Wellness, 2016–2017 average              |
| Non-fatal overdose rate, all drugs                                      | Number of non-fatal overdoses, per 100,000 population, that resulted in a hospitalization or emergency department visit regardless of the drug type that caused the overdose.                                                                                     | TDH Prescription Drug Overdose Program, 2016–2017 average  |
| Non-fatal overdose rate, heroin only                                    | Number of non-fatal overdoses that resulted in a hospitalization or emergency department visit for heroin only.                                                                                                                                                   | TDH Prescription Drug Overdose Program, 2016–2017 average  |
| Non-fatal overdose rate, opioids only                                   | Number of non-fatal overdoses, per 100,000 population, that resulted in a hospitalization or emergency department visit for opioids only.                                                                                                                         | TDH Prescription Drug Overdose Program, 2016–2017 average  |
| Number of mobile homes                                                  | Number of mobile homes.                                                                                                                                                                                                                                           | American Community Survey, 2016–2017 average               |
| Occupied housing units                                                  | Number of occupied housing units.                                                                                                                                                                                                                                 | American Community Survey, 2016–2017 average               |

| Potential Indicator                                                   | Indicator Description (County-level)                                                                                                                                                                                                                                                                     | Data Source                                               |
|-----------------------------------------------------------------------|----------------------------------------------------------------------------------------------------------------------------------------------------------------------------------------------------------------------------------------------------------------------------------------------------------|-----------------------------------------------------------|
| Patients filling buprenorphine prescriptions                          | The number of people per county filling buprenorphine prescriptions as a way to measure adoption of buprenorphine treatment.                                                                                                                                                                             | TDH Prescription Drug Overdose Program, 2016–2017 average |
| Per capita income                                                     | Mean income per person in the county; derived by dividing the total income of all people by the total population.                                                                                                                                                                                        | American Community Survey, 2016–2017 average              |
| Per capita income, log                                                | Mean income per person in the county; derived by dividing the total income of all people by the total population and modeled as log base 10.                                                                                                                                                             | American Community Survey, 2016–2017 average              |
| Percentage of adults who smoke                                        | Percentage of adults who are current smokers.                                                                                                                                                                                                                                                            | County Health Rankings, 2018                              |
| Percentage of clients in TDMHSAS-funded opioid treatment and recovery | Percent of individuals aged 12 years or older receiving Tennessee Department of Mental Health and Substance Abuse Services (TDMHSAS) funded substance abuse treatment and recovery services for any opioid abuse.                                                                                        | TDMHSAS, 2017                                             |
| Percentage of homes with at least one vehicle                         | Number of households with a vehicle available divided by the total estimated number of households per county.                                                                                                                                                                                            | American Community Survey, 2016–2017 average              |
| Percentage of homes with no phone Service                             | Average percentage of the total housing units without phone service.                                                                                                                                                                                                                                     | American Community Survey, 2016–2017 average              |
| Percentage of mobile homes                                            | Percentage of the total housing units that were mobile homes, calculated by dividing the total number of mobile homes by the total number of housing units.                                                                                                                                              | American Community Survey, 2016–2017 average              |
| Percentage of population aged 20–24 years                             | Percentage of those aged 20–24; calculated by dividing the population aged 20-24 by the estimated population.                                                                                                                                                                                            | American Community Survey, 2016–2017 average              |
| Percentage of population aged 20–44 years                             | Percentage of those aged 20–44; calculated by dividing the population aged 20-44 by the estimated population.                                                                                                                                                                                            | American Community Survey, 2016–2017 average              |
| Percentage of population identified as white non-Hispanic             | Number of persons who reported they were not Hispanic or Latino and were of white race alone divided by the estimated total county population.                                                                                                                                                           | American Community Survey, 2016–2017 average              |
| Percentage of population living in poverty                            | Based on US Census Bureau income thresholds by family size and composition. If a family's total income is less than the family's threshold, then that family and every individual in it is considered in poverty. The number of persons in poverty was divided by the estimated total county population. | American Community Survey, 2016–2017 average              |
| Percentage of population never married                                | The percent of the population of a county that was never married, calculated by dividing the number of residents who were never married by the estimated population.                                                                                                                                     | American Community Survey, 2016–2017 average              |
| Percentage of population unemployed                                   | Number of civilian persons unemployed and actively seeking work divided by the estimated total civilian population aged 16 years and older.                                                                                                                                                              | American Community Survey, 2016–2017 average              |
| Percentage of population uninsured                                    | Number of persons without health insurance coverage was divided by total civilian noninstitutionalized population.                                                                                                                                                                                       | American Community Survey, 2016–2017 average              |
| Percentage of population with a disability                            | Percent of the population with a disability.                                                                                                                                                                                                                                                             | American Community Survey, 2016–2017 average              |
| Percentage of population with no high school diploma                  | Number of persons aged 25 years and older with less than a 12th grade education (including individuals with 12 grades but no diploma) divided by the estimated county population age 25 years and older.                                                                                                 | American Community Survey, 2016–2017 average              |
| Poor mental health days                                               | Number of mentally unhealthy days reported in past 30 days (age-adjusted).                                                                                                                                                                                                                               | County Health Rankings, 2018                              |
| Poor physical health days                                             | Number of physically unhealthy days reported in past 30 days (age-adjusted).                                                                                                                                                                                                                             | County Health Rankings, 2018                              |
| Population aged 20–24 years                                           | Average number of people aged 20–24.                                                                                                                                                                                                                                                                     | American Community Survey, 2016–2017 average              |
| Population decline, 2000–2016                                         | A measure of population decline at the county level between 2000 and 2016.                                                                                                                                                                                                                               | American Community Survey, 2016–2017 average              |
| Population estimate                                                   | Estimated population for each county.                                                                                                                                                                                                                                                                    | American Community Survey, 2016–2017 average              |
| Population estimate, log                                              | Estimated population for each county, modeled as log base 10.                                                                                                                                                                                                                                            | American Community Survey, 2016–2017 average              |
| Population per square mile                                            | Population per square mile.                                                                                                                                                                                                                                                                              | American Community Survey, 2016–2017 average              |
| Population per square mile, log                                       | Population per square mile, modeled as log base 10.                                                                                                                                                                                                                                                      | American Community Survey, 2016–2017 average              |
| Premature deaths                                                      | Count of the premature deaths that occurred with a county, based on years of potential life lost before age 75 per 100,000 population (age-adjusted).                                                                                                                                                    | County Health Rankings, 2018                              |
| Primary care provider rate                                            | The number of primary care providers per 100,000 population.                                                                                                                                                                                                                                             | County Health Rankings, 2018                              |
| Primary care providers                                                | Number of primary care providers.                                                                                                                                                                                                                                                                        | County Health Rankings, 2018                              |
| Rate of buprenorphine providers                                       | Number of buprenorphine providers, per 100,000 population, in each county. Interaction term with missingness indicator.                                                                                                                                                                                  | SAMHSA                                                    |
| Rate of Injury related deaths                                         | Number of deaths related to injuries per 100,000 population.                                                                                                                                                                                                                                             | County Health Rankings, 2018                              |
| Rate of syphilis infections                                           | The number of syphilis (primary, secondary, early and late latent) cases per 100,000 population                                                                                                                                                                                                          | TDH STD Prevention Program, 2016–2017 average             |

| Potential Indicator                 | Indicator Description (County-level)                                                                                                                                                               | Data Source                                          |
|-------------------------------------|----------------------------------------------------------------------------------------------------------------------------------------------------------------------------------------------------|------------------------------------------------------|
| Residents who were never married    | The number of people aged 15 and older who report never being married.                                                                                                                             | American Community Survey, 2016–2017 average         |
| Sexually transmitted disease rate   | The rate of sexually transmitted disease (gonorrhea, chlamydia) per 100,000 population by county. 2016 and 2017 data were collected and averaged for each county to calculate this measure.        | American Community Survey, 2016–2017 average         |
| Social associations                 | The number of membership associations.                                                                                                                                                             | County Health Rankings, 2018                         |
| Social associations eate            | The number of membership associations per 10,000 population.                                                                                                                                       | County Health Rankings, 2018                         |
| Teen birth rate                     | Number of births among female teenagers, 15–19 years old, per 1,000.                                                                                                                               | American Community Survey, 2016–2017 average         |
| Theft crimes                        | The number of theft crimes (robbery, pickpocketing, purse snatching, shoplifting, from buildings, from coin machines, from motor vehicles, of motor vehicle parts, of motor vehicles) in a county. | Tennessee Bureau of Investigation, 2016–2017 average |
| Total housing units                 | Number of housing units.                                                                                                                                                                           | American Community Survey, 2016–2017 average         |
| Vacant housing units                | Number of vacant housing units.                                                                                                                                                                    | American Community Survey, 2016–2017 average         |
| Violent crimes                      | The number of violent crimes (murder, forcible rape, aggravated assault) in a county.                                                                                                              | Tennessee Bureau of Investigation, 2016–2017 average |
| Years of potential life lost        | Years of potential life lost before age 75 per 100,000 population (age-adjusted).                                                                                                                  | County Health Rankings, 2018                         |
| TDH: Tennessee Department of Health |                                                                                                                                                                                                    |                                                      |

TDMHSA: Tennessee Department of Mental Health and Substance Abuse Services
