# Supplementary material for: Assessment of Tennessee’s county-level vulnerability to hepatitis C virus and HIV outbreaks using socioeconomic, healthcare, and substance use indicators
Source: PubMed Central journal article supplement (PMC9352017; doi:10.1371/journal.pone.0270891), 2022-08-04
Supplement: pone.0270891.s003.pdf [file pone.0270891.s003.pdf]

Supplementary Table 3: 21 variables used in analysis that are available upon request with contact information provided

| Variable                                | Description                                                                                                                                                           | Source                                                             | Contact Information                                                                                                                                                             |
|-----------------------------------------|-----------------------------------------------------------------------------------------------------------------------------------------------------------------------|--------------------------------------------------------------------|---------------------------------------------------------------------------------------------------------------------------------------------------------------------------------|
| Drug Coalition?                         | Is there a funded drug coalition present within the county? Fiscal year 2018 data were used.                                                                          | Tennessee Department of Mental Health and Substance Abuse Services | Requested from Tony Jackson, TDMHSAS Director of Prevention Services, anthony.jackson@tn.gov                                                                                    |
| Certified pain management clinics       | The count of certified pain clinics per county. This does not capture pain clinics that are not registered. Data is 2017 and prior.                                   | Health Licensure and Regulation                                    | Requested from Tonya Wilkins Pain Management Clinic Administrator, painmanagement.health@tn.gov                                                                                 |
| Neonatal Abstinence Syndrome Cases      | The number of Neonatal Abstinence Syndrome cases per county. 2016 and 2017 data were collected and averaged for each county.                                          | Family Health and Wellness                                         | Requested from Dr. Dr. Alice Nyakeriga, NAS Epidemiologist, alice.nyakeriga@tn.gov                                                                                              |
| Rate of HIV Incidence                   | The rate of new HIV diagnoses, per 100,000 population, by county. 2016 and 2017 data were collected and averaged for each county to calculate this measure.           | Enhanced HIV/AIDS Reporting System                                 | Requested from TN Department of Health, <a href="https://www.surveygizmo.com/s3/5819792/TDH-Data-Request-Form">https://www.surveygizmo.com/s3/5819792/TDH-Data-Request-Form</a> |
| Rate of HIV Prevalence                  | The rate, per 100,000 population, of living diagnosed HIV cases, by county. 2016 and 2017 data were collected and averaged for each county to calculate this measure. | Enhanced HIV/AIDS Reporting System                                 | Requested from TN Department of Health, <a href="https://www.surveygizmo.com/s3/5819792/TDH-Data-Request-Form">https://www.surveygizmo.com/s3/5819792/TDH-Data-Request-Form</a> |
| HIV cases related to Injection Drug Use | The count of any living diagnosed HIV cases related to injection drug use, by county. 2016 and 2017 data were collected and averaged for each county.                 | Enhanced HIV/AIDS Reporting System                                 | Requested from TN Department of Health, <a href="https://www.surveygizmo.com/s3/5819792/TDH-Data-Request-Form">https://www.surveygizmo.com/s3/5819792/TDH-Data-Request-Form</a> |
| Rate of Sexually Transmitted Diseases   | The rate of sexually transmitted disease (gonorrhea, chlamydia) per 100,000 population by county. 2016 and 2017 data were collected                                   | Patient Reporting Investigation                                    | Requested from TN Department of Health, <a href="https://www.surveygizmo.com/s3/5819792/TDH-Data-Request-Form">https://www.surveygizmo.com/s3/5819792/TDH-Data-Request-Form</a> |

|                                        |                                                                                                                                                                                                                                                                                 |                                                              |                                                                                                                                                                                                                                                                                                                                                                                                                                                         |
|----------------------------------------|---------------------------------------------------------------------------------------------------------------------------------------------------------------------------------------------------------------------------------------------------------------------------------|--------------------------------------------------------------|---------------------------------------------------------------------------------------------------------------------------------------------------------------------------------------------------------------------------------------------------------------------------------------------------------------------------------------------------------------------------------------------------------------------------------------------------------|
|                                        | and averaged for each county to calculate this measure.                                                                                                                                                                                                                         | Surveillance Manager                                         |                                                                                                                                                                                                                                                                                                                                                                                                                                                         |
| Rate of Syphilis Infections            | The rate of syphilis (primary, secondary, early, and late latent) cases per 100,000 residents, by county. 2016 and 2017 data were collected and averaged for each county to calculate this measure.                                                                             | Patient Reporting Investigation Surveillance Manager         | Requested from TN Department of Health, <a href="https://www.surveygizmo.com/s3/5819792/TDH-Data-Request-Form">https://www.surveygizmo.com/s3/5819792/TDH-Data-Request-Form</a>                                                                                                                                                                                                                                                                         |
| Rate of Acute Hepatitis C Infections   | The rate of acute Hepatitis C infection cases per 100,000 residents, by county. 2016 and 2017 data were collected and averaged for each county to calculate this measure.                                                                                                       | National Electronic Disease Surveillance System Based System | Requested from TN Department of Health, <a href="https://www.surveygizmo.com/s3/5819792/TDH-Data-Request-Form">https://www.surveygizmo.com/s3/5819792/TDH-Data-Request-Form</a>                                                                                                                                                                                                                                                                         |
| Rate of Chronic Hepatitis C Infections | The rate of chronic Hepatitis C infection cases, ages 13-39, per 100,000 residents, by county. 2016 and 2017 data were collected and averaged for each county to calculate this measure.                                                                                        | National Electronic Disease Surveillance System Based System | Requested from TN Department of Health, <a href="https://www.surveygizmo.com/s3/5819792/TDH-Data-Request-Form">https://www.surveygizmo.com/s3/5819792/TDH-Data-Request-Form</a>                                                                                                                                                                                                                                                                         |
| Non-fatal Overdoses, all drugs         | The rate of non-fatal overdoses, per 100,000 population, that resulted in a hospitalization or emergency department visit regardless of the drug type that caused the overdose by county. 2016 and 2017 data were collected and averaged for each county to calculate the rate. | Prescription Drug Overdose Program                           | 2017 non-fatal data: <a href="https://www.tn.gov/content/tn/health/health-program-areas/pdo/pdo/data-dashboard.html#downloadabledata">https://www.tn.gov/content/tn/health/health-program-areas/pdo/pdo/data-dashboard.html#downloadabledata</a> ; 2016 non-fatal data: Requested from TN Department of Health, <a href="https://www.surveygizmo.com/s3/5819792/TDH-Data-Request-Form">https://www.surveygizmo.com/s3/5819792/TDH-Data-Request-Form</a> |

|                                                            |                                                                                                                                                                                                                                              |                                    |                                                                                                                                                                                                                                                                                                                                                                                                                                                         |
|------------------------------------------------------------|----------------------------------------------------------------------------------------------------------------------------------------------------------------------------------------------------------------------------------------------|------------------------------------|---------------------------------------------------------------------------------------------------------------------------------------------------------------------------------------------------------------------------------------------------------------------------------------------------------------------------------------------------------------------------------------------------------------------------------------------------------|
| Non-fatal Overdoses, opioids only                          | The rate of non-fatal overdoses, per 100,000 population, that resulted in a hospitalization or emergency department visit for opioids only, by county. 2016 and 2017 data were collected and averaged for each county to calculate the rate. | Prescription Drug Overdose Program | 2017 non-fatal data: <a href="https://www.tn.gov/content/tn/health/health-program-areas/pdo/pdo/data-dashboard.html#downloadabledata">https://www.tn.gov/content/tn/health/health-program-areas/pdo/pdo/data-dashboard.html#downloadabledata</a> ; 2016 non-fatal data: Requested from TN Department of Health, <a href="https://www.surveygizmo.com/s3/5819792/TDH-Data-Request-Form">https://www.surveygizmo.com/s3/5819792/TDH-Data-Request-Form</a> |
| Non-fatal Overdoses, heroin only                           | The rate of non-fatal overdoses that resulted in a hospitalization or emergency department visit for heroin only, by county. 2016 and 2017 data were collected and averaged for each county to calculate the rate.                           | Prescription Drug Overdose Program | 2017 non-fatal data: <a href="https://www.tn.gov/content/tn/health/health-program-areas/pdo/pdo/data-dashboard.html#downloadabledata">https://www.tn.gov/content/tn/health/health-program-areas/pdo/pdo/data-dashboard.html#downloadabledata</a> ; 2016 non-fatal data: Requested from TN Department of Health, <a href="https://www.surveygizmo.com/s3/5819792/TDH-Data-Request-Form">https://www.surveygizmo.com/s3/5819792/TDH-Data-Request-Form</a> |
| Total MME for all drugs                                    | The total morphine milligram equivalent for all opioids for pain with a conversion factor, per county. 2016 and 2017 data were collected and averaged for each county.                                                                       | Prescription Drug Overdose Program | Data Request: Requested from TN Department of Health, <a href="https://www.surveygizmo.com/s3/5819792/TDH-Data-Request-Form">https://www.surveygizmo.com/s3/5819792/TDH-Data-Request-Form</a>                                                                                                                                                                                                                                                           |
| Log of Total MME for all drugs                             | The log of the total morphine milligram equivalent for all opioids for pain with a conversion factor, per county. 2016 and 2017 data were collected and averaged for each county.                                                            | Prescription Drug Overdose Program | Data Request: Requested from TN Department of Health, <a href="https://www.surveygizmo.com/s3/5819792/TDH-Data-Request-Form">https://www.surveygizmo.com/s3/5819792/TDH-Data-Request-Form</a>                                                                                                                                                                                                                                                           |
| The number of patients filling buprenorphine prescriptions | The number of people per county filling buprenorphine prescriptions to measure adoption of buprenorphine treatment. 2016 and 2017 data were collected and averaged for each county.                                                          | Prescription Drug Overdose Program | Data Request: Requested from TN Department of Health, <a href="https://www.surveygizmo.com/s3/5819792/TDH-Data-Request-Form">https://www.surveygizmo.com/s3/5819792/TDH-Data-Request-Form</a>                                                                                                                                                                                                                                                           |

|                                           |                                                                                                                                                                                                                                                                                                                                                                                                                                                                                                                                                 |                                    |                                                                                                                                                                                                                                                                                                                                                                                                                                                 |
|-------------------------------------------|-------------------------------------------------------------------------------------------------------------------------------------------------------------------------------------------------------------------------------------------------------------------------------------------------------------------------------------------------------------------------------------------------------------------------------------------------------------------------------------------------------------------------------------------------|------------------------------------|-------------------------------------------------------------------------------------------------------------------------------------------------------------------------------------------------------------------------------------------------------------------------------------------------------------------------------------------------------------------------------------------------------------------------------------------------|
| Multiple provider Episodes                | The count of MPEs that occurred in each county defined as a single patient filling an opioid prescription with at least five distinct pharmacies and from at least five distinct prescribers in a 6-month period (either January 1 - June 30 or July 1 - December 31). An MPE may also occur for a patient who has prescriptions written by multiple providers in a single practice and uses multiple pharmacies. A distinct patient may have a multiple provider episode once in each 6-month period for a total of 2 potential MPEs per year. | Prescription Drug Overdose Program | Data Request: Requested from TN Department of Health, <a href="https://www.surveygizmo.com/s3/5819792/TDH-Data-Request-Form">https://www.surveygizmo.com/s3/5819792/TDH-Data-Request-Form</a>                                                                                                                                                                                                                                                   |
| Deaths related to all drugs               | The count of all deaths attributed to any kind of drug. The county of residence for the person who died is captured. 2016 and 2017 data were collected and averaged for each county.                                                                                                                                                                                                                                                                                                                                                            | Prescription Drug Overdose Program | 2017 fatal data: <a href="https://www.tn.gov/content/tn/health/health-program-areas/pdo/pdo/data-dashboard.html#downloadabledata">https://www.tn.gov/content/tn/health/health-program-areas/pdo/pdo/data-dashboard.html#downloadabledata</a> ; 2016 fatal data: Requested from TN Department of Health, <a href="https://www.surveygizmo.com/s3/5819792/TDH-Data-Request-Form">https://www.surveygizmo.com/s3/5819792/TDH-Data-Request-Form</a> |
| Deaths related to heroin and opioids only | The count of all deaths attributed to heroin or opioids. The county of residence for the person who died is captured. 2016 and 2017 data were collected and averaged for each county.                                                                                                                                                                                                                                                                                                                                                           | Prescription Drug Overdose Program | 2017 fatal data: <a href="https://www.tn.gov/content/tn/health/health-program-areas/pdo/pdo/data-dashboard.html#downloadabledata">https://www.tn.gov/content/tn/health/health-program-areas/pdo/pdo/data-dashboard.html#downloadabledata</a> ; 2016 fatal data: Requested from TN Department of Health, <a href="https://www.surveygizmo.com/s3/5819792/TDH-Data-Request-Form">https://www.surveygizmo.com/s3/5819792/TDH-Data-Request-Form</a> |
| Rate of Death, all drugs                  | The rate, per 100,000, of the number of deaths related to all drugs. 2016 and 2017 data were collected and averaged for each county.                                                                                                                                                                                                                                                                                                                                                                                                            | Prescription Drug Overdose Program | 2017 fatal data: <a href="https://www.tn.gov/content/tn/health/health-program-areas/pdo/pdo/data-dashboard.html#downloadabledata">https://www.tn.gov/content/tn/health/health-program-areas/pdo/pdo/data-dashboard.html#downloadabledata</a> ; 2016 fatal data: Requested from TN Department of Health, <a href="https://www.surveygizmo.com/s3/5819792/TDH-Data-Request-Form">https://www.surveygizmo.com/s3/5819792/TDH-Data-Request-Form</a> |

Rate of Death,  
heroin, and  
opioids only

The rate, per 100,000, of the  
number of deaths related to heroin  
and opioids. 2016 and 2017 data  
were collected and averaged for  
each county.

Prescription  
Drug Overdose  
Program

2017 fatal data: <https://www.tn.gov/content/tn/health/health-program-areas/pdo/pdo/data-dashboard.html#downloadabledata>; 2016 fatal data:  
Requested from TN Department of Health,  
<https://www.surveygizmo.com/s3/5819792/TDH-Data-Request-Form>
